# Supplementary material for: Genomic Profiling of Radiation-Induced Sarcomas Reveals the Immunologic Characteristics and Its Response to Immune Checkpoint Blockade
Source: PubMed Central journal article supplement — Clin Cancer Res. 2023 May 15;29(15):2869–84. doi: 10.1158/1078-0432.CCR-22-3567 (PMC10390862; doi:10.1158/1078-0432.ccr-22-3567), 2023-05-15
Supplement: ccr-22-3567_supplementary_figure_s1_suppfs1.pdf [file ccr-22-3567_supplementary_figure_s1_suppfs1.pdf]

# Supplemental Figure 1

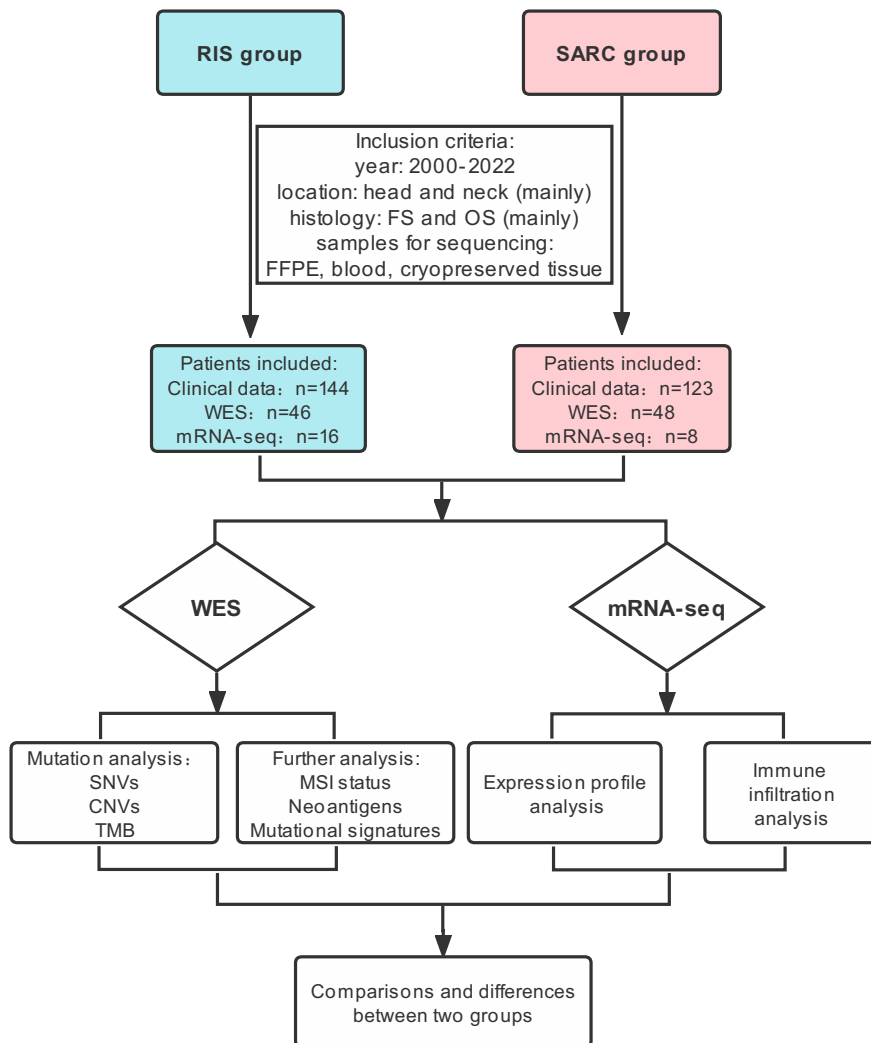

Supplemental Figure 1. The flowchart showing patient screening and identification, and analysis steps for mRNA-seq and WES data. FS: fibrosarcoma; OS: osteosarcoma.
