# Supplementary material for: Genomic Profiling of Radiation-Induced Sarcomas Reveals the Immunologic Characteristics and Its Response to Immune Checkpoint Blockade
Source: PubMed Central journal article supplement — Clin Cancer Res. 2023 May 15;29(15):2869–84. doi: 10.1158/1078-0432.CCR-22-3567 (PMC10390862; doi:10.1158/1078-0432.ccr-22-3567), 2023-05-15
Supplement: ccr-22-3567_supplementary_figure_s2_suppfs2.pdf [file ccr-22-3567_supplementary_figure_s2_suppfs2.pdf]

Supplemental Figure 2

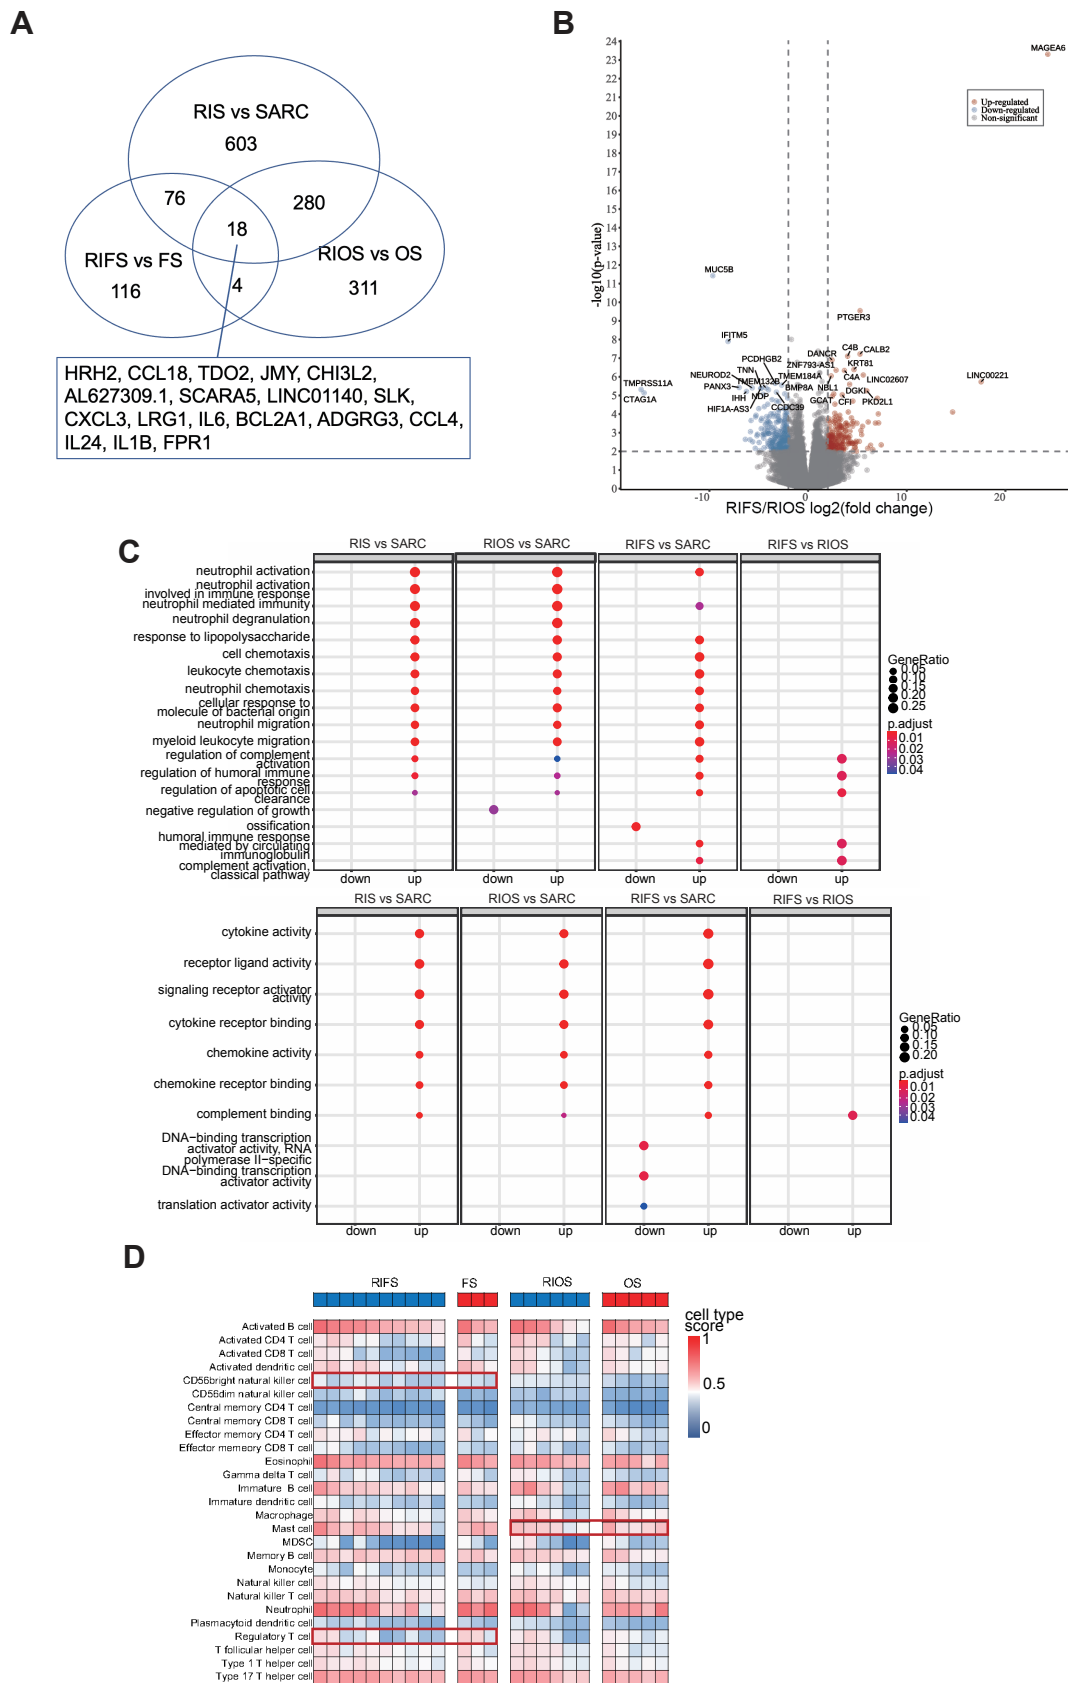

Supplemental Figure 2. RNA-seq analysis between RIS and RIS groups and some subtypes. (A) Venn plot showing differentially expressed genes (DEGs) of FS and OS subtype comparison between RIS and SARC groups. (B) Volcano plot showing up-regulated and down-regulated genes in the RIFS group versus the RIOS group. (C) GO pathway enrichment of mRNA-seq between the RIS group and SARC group, and between the RIFS and RIOS subtypes. (D) Relative abundances of activated immune cells and immunosuppression-related cells in subtypes of RISs and primary sarcomas.
