# Supplementary material for: Genomic Profiling of Radiation-Induced Sarcomas Reveals the Immunologic Characteristics and Its Response to Immune Checkpoint Blockade
Source: PubMed Central journal article supplement — Clin Cancer Res. 2023 May 15;29(15):2869–84. doi: 10.1158/1078-0432.CCR-22-3567 (PMC10390862; doi:10.1158/1078-0432.ccr-22-3567), 2023-05-15
Supplement: ccr-22-3567_supplementary_figure_s3_suppfs3.pdf [file ccr-22-3567_supplementary_figure_s3_suppfs3.pdf]

# Supplemental Figure 3

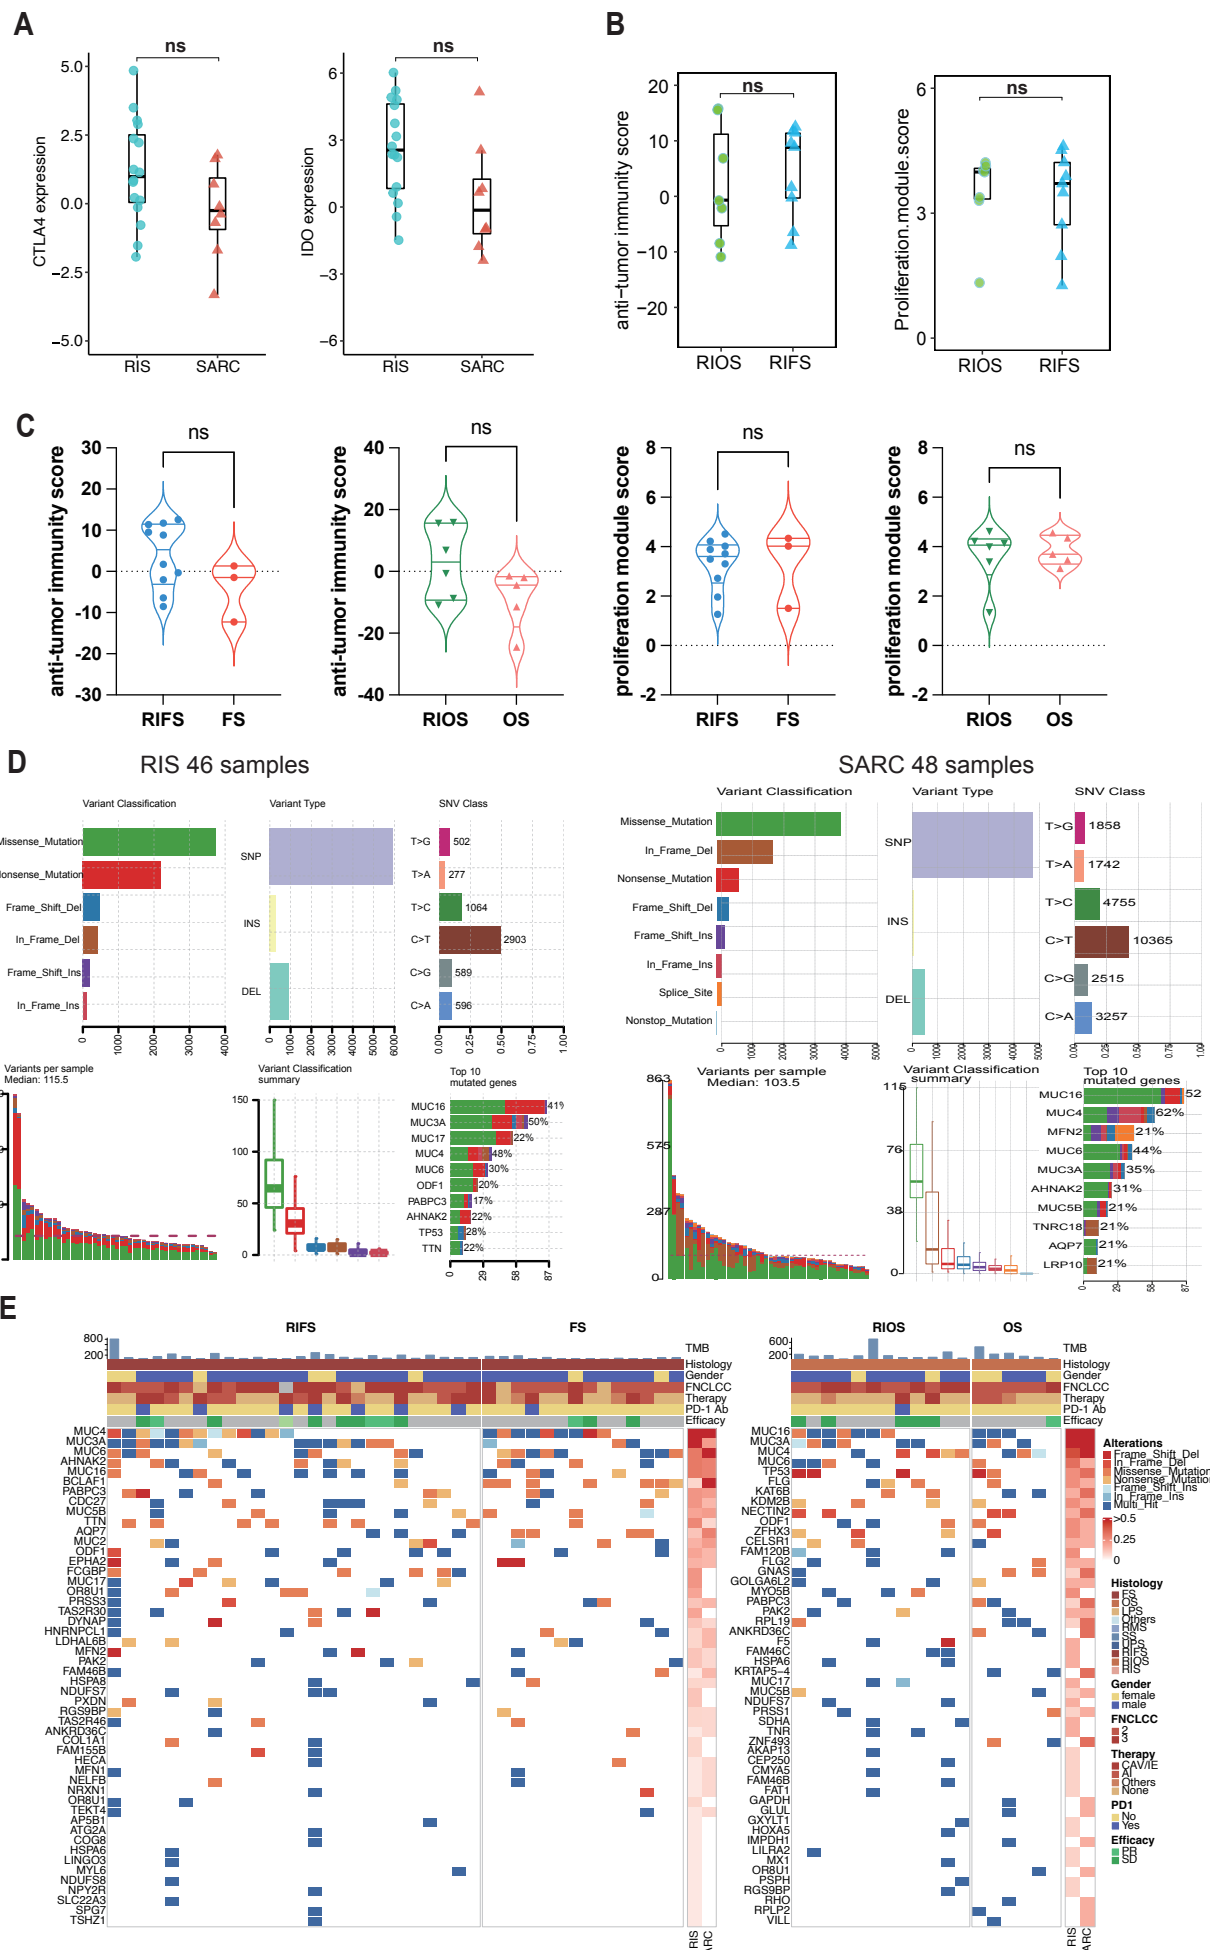

Supplemental Figure 3. Comparison between RIS group and SARC group in mRNA-seq and WES data.

(A) Expression levels of IDO and CTLA-4 in the RIS group and SARC group in mRNA-seq.

(B) The anti-tumor immunity score and the proliferation module score of the RIFS group and the RIOS group.

(C) The comparison of the anti-tumor immunity score and the proliferation module score between subtypes RIFS vs FS and between RIOS vs OS.

(D) Mutation summary of WES data in the RIS and SARC groups.

(E) Top 50 mutated genes in RIFS, FS, RIOS and OS subtype groups.
