# Supplementary material for: Genomic Profiling of Radiation-Induced Sarcomas Reveals the Immunologic Characteristics and Its Response to Immune Checkpoint Blockade
Source: PubMed Central journal article supplement — Clin Cancer Res. 2023 May 15;29(15):2869–84. doi: 10.1158/1078-0432.CCR-22-3567 (PMC10390862; doi:10.1158/1078-0432.ccr-22-3567), 2023-05-15
Supplement: ccr-22-3567_supplementary_figure_s4_suppfs4.pdf [file ccr-22-3567_supplementary_figure_s4_suppfs4.pdf]

# Supplemental Figure 4

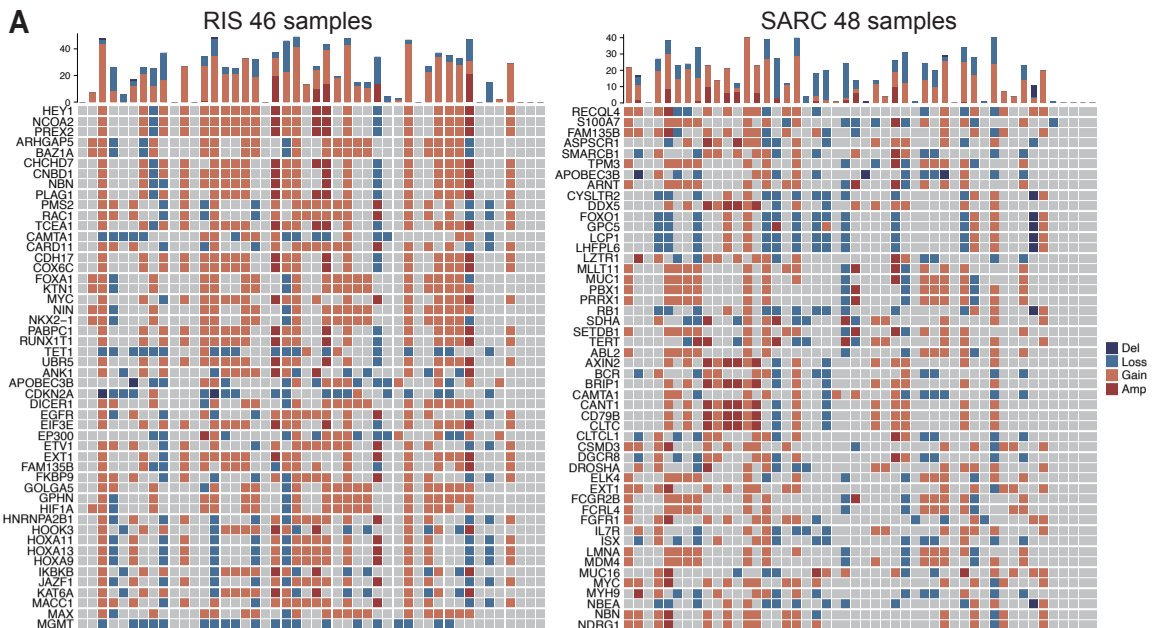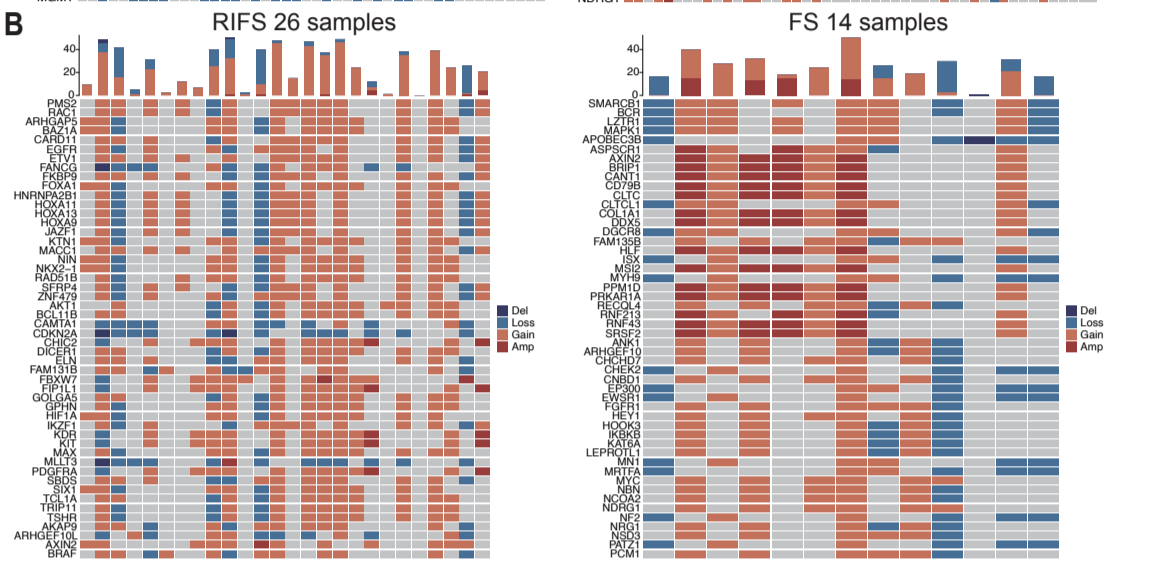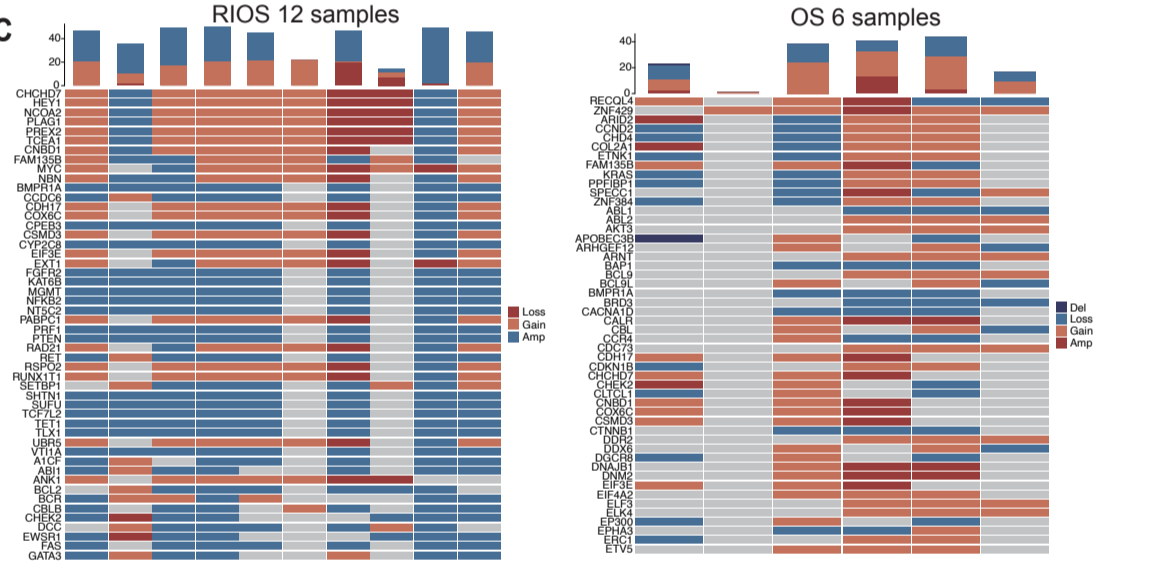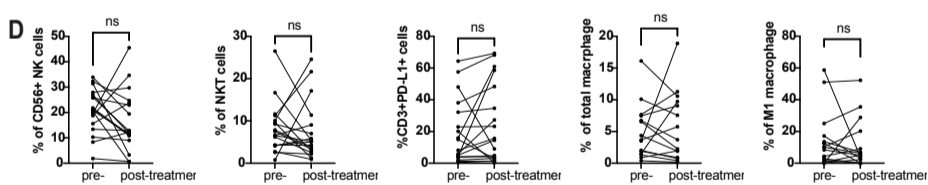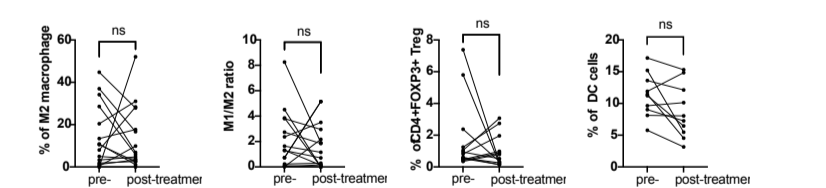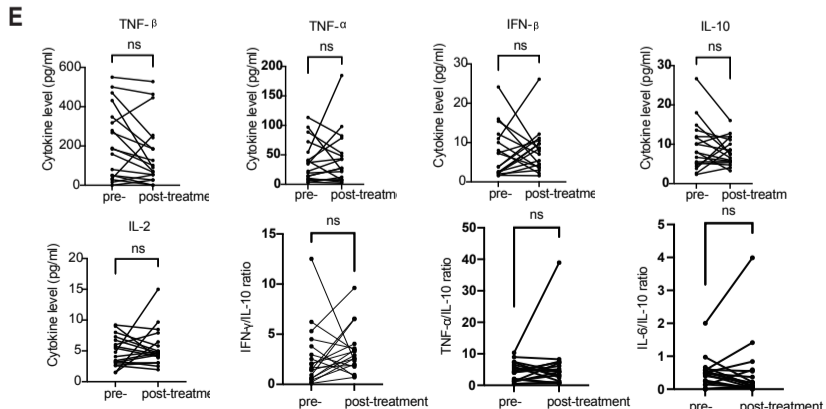

Supplemental Figure 4. The landscape of copy number variants and results for blood detection.

(A) Top genes in copy number changes in RIS and SARC groups filtered by COSMIC gene list.

(B) Top genes in copy number changes in RIFS and FS subtypes.

(C) Top genes in copy number changes in RIOS and OS subtypes.

(D and E) Flow cytometry (D) and ELISA (E) results of immune cells and cytokines in peripheral blood from patients.
