# Supplementary material for: Genomic Profiling of Radiation-Induced Sarcomas Reveals the Immunologic Characteristics and Its Response to Immune Checkpoint Blockade
Source: PubMed Central journal article supplement — Clin Cancer Res. 2023 May 15;29(15):2869–84. doi: 10.1158/1078-0432.CCR-22-3567 (PMC10390862; doi:10.1158/1078-0432.ccr-22-3567), 2023-05-15
Supplement: ccr-22-3567_supplementary_table_s1_suppts1.pdf [file ccr-22-3567_supplementary_table_s1_suppts1.pdf]

**Supplemental Table 1. Clinical characteristics of patients in RIS group and SARC group as a whole, or for WES, or for mRNA-seq.**

| Variables                                                  | RIS group                      | SARC group                  | p-value           | RIS-WES                         | SARC-WES                        | p-value           | RIS-RNA                    | SARC-RNA         | p-value |
|------------------------------------------------------------|--------------------------------|-----------------------------|-------------------|---------------------------------|---------------------------------|-------------------|----------------------------|------------------|---------|
| <b>Total patient number</b>                                | 144                            | 123                         |                   | 46                              | 48                              |                   | 16                         | 8                |         |
| <b>Age at diagnosis</b>                                    |                                |                             |                   |                                 |                                 |                   |                            |                  |         |
| Mean (years old)                                           | 49.0                           | 38.9                        | <b>&lt; 0.001</b> | 48.9                            | 42.5                            | <b>0.011</b>      | 51.3                       | 50.9             | 0.928   |
| Median (years old)                                         | 48                             | 38                          | -                 | 48                              | 42                              | -                 | 48                         | 47.5             | -       |
| Range (years)                                              | 20-84                          | 5-83                        | -                 | 20-70                           | 19-69                           | -                 | 34-77                      | 41-69            | -       |
| > vs. ≤40 years old                                        | 113 (78.47%)vs.<br>31 (21.53%) | 55 (44.7%)vs.<br>68 (55.3%) | <b>&lt; 0.001</b> | 36 (78.3%)<br>vs.<br>10 (21.7%) | 26 (54.2%)<br>vs.<br>22 (45.8%) | <b>0.017</b>      | 13 (81.3%)vs.<br>3 (18.8%) | 8 (100%)vs.<br>0 | 0.526   |
| <b>Gender</b>                                              |                                |                             | 0.0672            |                                 |                                 | 0.366             |                            |                  | 0.129   |
| Male                                                       | 104 (72.2%)                    | 75 (61.0%)                  |                   | 35 (76.1%)                      | 32 (66.7%)                      |                   | 14 (87.5%)                 | 4 (50.0%)        |         |
| Female                                                     | 40 (27.8%)                     | 48 (39.0%)                  |                   | 11 (23.9%)                      | 16 (33.3%)                      |                   | 2 (12.5%)                  | 4 (50.0%)        |         |
| <b>Latency between primary and secondary tumor (years)</b> |                                |                             | -                 |                                 |                                 | -                 |                            |                  | -       |
| Mean                                                       | 9.87                           | /                           |                   | 9.3                             | /                               |                   | 9                          | /                |         |
| Median                                                     | 9                              | /                           |                   | 9                               | /                               |                   | 9                          | /                |         |
| Range                                                      | 2-37                           | /                           |                   | 3-25                            | /                               |                   | 4-16                       | /                |         |
| <b>Histology of first/primary tumor</b>                    |                                |                             | -                 |                                 |                                 | -                 |                            |                  | -       |
| NPC                                                        | 118 (81.9%)                    | /                           |                   | 38 (82.6%)                      | /                               |                   | 13 (81.3%)                 | /                |         |
| Others                                                     | 26 (18.1%)                     | /                           |                   | 8 (17.4%)                       | /                               |                   | 3 (18.8%)                  | /                |         |
| <b>Subtypes of sarcoma</b>                                 |                                |                             | <b>&lt; 0.001</b> |                                 |                                 | <b>&lt; 0.001</b> |                            |                  | 0.391   |
| Fibrosarcoma                                               | 65 (45.1%)                     | 45 (36.6%)                  |                   | 26 (56.5%)                      | 14 (29.2%)                      |                   | 10 (62.5%)                 | 3 (37.5%)        |         |
| Osteosarcoma                                               | 31 (21.5%)                     | 29 (23.6%)                  |                   | 12 (26.1%)                      | 6 (12.5%)                       |                   | 6 (37.5%)                  | 5 (62.5%)        |         |
| UPS/MFH                                                    | 17 (11.8%)                     | 14 (11.4%)                  |                   | 2 (4.3%)                        | 6 (12.5%)                       |                   | /                          | /                |         |
| Angiosarcoma                                               | 4 (2.8%)                       | 2 (1.6%)                    |                   | 1 (2.2%)                        | 0                               |                   | /                          | /                |         |
| Synovia sarcoma                                            | 1 (0.7%)                       | 7 (5.7%)                    |                   | 1 (2.2%)                        | 6 (12.5%)                       |                   | /                          | /                |         |
| Rhabdomyosarcoma                                           | 2 (1.4%)                       | 7 (5.7%)                    |                   | 0                               | 5 (10.4%)                       |                   | /                          | /                |         |

|                           |             |            |                   |            |                   |           |              |
|---------------------------|-------------|------------|-------------------|------------|-------------------|-----------|--------------|
| Sarcoma without subtypes  | 24 (16.7%)  | 9 (7.3%)   | 4 (8.7%)          | 2 (4.2%)   | /                 | /         |              |
| Others (LMS, ASPS, MPNST) | 0           | 10 (8.1%)  | 0                 | 9 (18.8%)  | /                 | /         |              |
| <b>Tumor location</b>     |             |            | <b>&lt; 0.001</b> |            | <b>&lt; 0.001</b> |           | <b>-</b>     |
| Head&neck                 | 134 (93.1%) | 71 (57.7%) | 42 (91.3%)        | 22 (45.8%) | 16 (100%)         | 8 (100%)  |              |
| Others                    | 10 (6.9%)   | 52 (42.3%) | 4 (8.7%)          | 26 (54.2%) | /                 | /         |              |
| <b>FNCLCC Grade</b>       |             |            | <b>&lt; 0.001</b> |            | <b>0.122</b>      |           | <b>0.002</b> |
| G1                        | 10 (6.9%)   | 16 (13.0%) | 7 (15.2%)         | 2 (4.2%)   | 0                 | 1 (12.5%) |              |
| G2                        | 60 (41.7%)  | 76 (61.8%) | 18 (39.1%)        | 26 (54.2%) | 2 (12.5%)         | 6 (75.0%) |              |
| G3                        | 63 (43.8%)  | 29 (23.6%) | 21(45.7%)         | 20 (41.7%) | 14 (87.5%)        | 1 (12.5%) |              |
| NA                        | 11 (7.6%)   | 2 (1.6%)   | /                 | /          | /                 | /         |              |

Abbreviations: NPC, nasopharyngeal carcinoma; UPS, Undifferentiated pleomorphic sarcoma; MFH, malignant fibrous histiocytoma; LMS, leiomyosarcoma; ASPS, alveolar soft part sarcoma; MPNST, malignant peripheral nerve sheath tumor.
