# Supplementary material for: Genomic Profiling of Radiation-Induced Sarcomas Reveals the Immunologic Characteristics and Its Response to Immune Checkpoint Blockade
Source: PubMed Central journal article supplement — Clin Cancer Res. 2023 May 15;29(15):2869–84. doi: 10.1158/1078-0432.CCR-22-3567 (PMC10390862; doi:10.1158/1078-0432.ccr-22-3567), 2023-05-15
Supplement: ccr-22-3567_supplementary_table_s3_suppts3.pdf [file ccr-22-3567_supplementary_table_s3_suppts3.pdf]

**Supplemental Table 3. Clinical characteristics of patients treated with chemotherapy alone and chemotherapy plus anti-PD-1 antibody in RIS group.**

| Variables                                              | RIS group                |                              | p value           |
|--------------------------------------------------------|--------------------------|------------------------------|-------------------|
|                                                        | Chemotherapy             | Chemotherapy + $\alpha$ PD-1 |                   |
| <b>Total patient number</b>                            | 25                       | 30                           |                   |
| <b>Age at diagnosis</b>                                |                          |                              |                   |
| Mean (years old)                                       | 46.0                     | 44.7                         | 0.620             |
| Median (years old)                                     | 47                       | 46                           | -                 |
| Range                                                  | 22-60                    | 20-67                        | -                 |
| > vs. $\leq$ 40 years old                              | 6 (24.0%) vs. 19 (76.0%) | 11 (36.7%) vs. 19 (63.3%)    | 0.312             |
| <b>Gender</b>                                          |                          |                              | <b>0.004</b>      |
| Male                                                   | 22 (88.0%)               | 15 (50.0%)                   |                   |
| Female                                                 | 3 (12.0%)                | 15 (50.0%)                   |                   |
| <b>Histology of first/primary tumor</b>                |                          |                              | 0.340             |
| NPC                                                    | 21 (84.0%)               | 22 (73.3%)                   |                   |
| Others                                                 | 4 (16.0%)                | 8 (26.7%)                    |                   |
| <b>Subtypes of sarcoma</b>                             |                          |                              | 0.149             |
| Fibrosarcoma                                           | 12 (48.0%)               | 9 (30.0%)                    |                   |
| Osteosarcoma                                           | 5 (20.0%)                | 7 (23.3%)                    |                   |
| UPS/MFH                                                | 4 (16.0%)                | 5 (16.7%)                    |                   |
| Angiosarcoma                                           | 0                        | 1 (3.3%)                     |                   |
| Rhabdomyosarcoma                                       | 1 (4.0%)                 | 0                            |                   |
| Sarcoma without subtypes                               | 3 (12.0%)                | 8 (26.7%)                    |                   |
| <b>Tumor location</b>                                  |                          |                              | 0.678             |
| Head&neck                                              | 23 (92.0%)               | 26 (86.7%)                   |                   |
| Others                                                 | 2 (8.0%)                 | 4 (13.3%)                    |                   |
| <b>Surgery before chemotherapy</b>                     |                          |                              | <b>&lt; 0.001</b> |
| Yes                                                    | 19 (76.0%)               | 7 (23.3%)                    |                   |
| No                                                     | 6 (24.0%)                | 23 (76.7%)                   |                   |
| <b>FNCLCC</b>                                          |                          |                              | 0.560             |
| 1                                                      | 2 (8.0%)                 | 2 (6.7%)                     |                   |
| 2                                                      | 11 (44.0%)               | 18 (60.0%)                   |                   |
| 3                                                      | 11 (44.0%)               | 8 (26.7%)                    |                   |
| NA                                                     | 1 (4.0%)                 | 2 (6.7%)                     |                   |
| <b>Efficacy</b>                                        |                          |                              | -                 |
| CR+PR                                                  | 2                        | 11                           |                   |
| SD+PD                                                  | 23                       | 19                           |                   |
| <b>Objective response rate (ORR)</b>                   | 2/25 (8.00%)             | 11/30 (36.67%)               | <b>0.024</b>      |
| <b>Disease control rate (DCR)</b>                      | 16/25 (64.00%)           | 29/30 (96.67%)               | <b>0.003</b>      |
| <b>Median overall survival (mOS)(months)</b>           | 14.8                     | 31.9                         | <b>0.014</b>      |
| <b>Median progression-free survival (mPFS)(months)</b> | 4.7                      | 9.5                          | <b>0.032</b>      |

Abbreviations: NPC, nasopharyngeal carcinoma; UPS, Undifferentiated pleomorphic sarcoma; MFH, malignant fibrous histiocytoma; CR, complete remission; PR, partial remission; SD, stable disease; PD, progressive disease.
