# Supplementary material for: Genomic Profiling of Radiation-Induced Sarcomas Reveals the Immunologic Characteristics and Its Response to Immune Checkpoint Blockade
Source: PubMed Central journal article supplement — Clin Cancer Res. 2023 May 15;29(15):2869–84. doi: 10.1158/1078-0432.CCR-22-3567 (PMC10390862; doi:10.1158/1078-0432.ccr-22-3567), 2023-05-15
Supplement: ccr-22-3567_supplementary_table_s4_suppts4.pdf [file ccr-22-3567_supplementary_table_s4_suppts4.pdf]

**Supplemental Table 4. Treatment-related adverse events of 30 RIS patients treated with chemotherapy plus anti-PD-1 antibody.**

| Adverse Events              | All grade  | Grade $\geq$ 3 | n (%)   |         |         |           |
|-----------------------------|------------|----------------|---------|---------|---------|-----------|
|                             |            |                | Grade 1 | Grade 2 | Grade 3 | Grade 4/5 |
| Leukopenia                  | 16 (53.3%) | 3 (10.0%)      | 7       | 6       | 3       | 0         |
| Neutropenia                 | 6 (20.0%)  | 3 (10.0%)      | 2       | 1       | 3       | 0         |
| Anemia                      | 26 (86.7%) | 5 (16.7%)      | 12      | 9       | 5       | 0         |
| Thrombocytopenia            | 3 (10.0%)  | 1 (3.3%)       | 2       | 0       | 1       | 0         |
| AST increased               | 3 (10.0%)  | 0              | 3       | 0       | 0       | 0         |
| ALT increased               | 3 (10.0%)  | 0              | 1       | 2       | 0       | 0         |
| Hyperlipidemia              | 7 (23.3%)  | 0              | 7       | 0       | 0       | 0         |
| Hyperuricemia               | 3 (10.0%)  | 0              | 2       | 1       | 0       | 0         |
| Hypoalbuminemia             | 9 (30.0%)  | 0              | 6       | 3       | 0       | 0         |
| Proteinuria                 | 3 (10.0%)  | 0              | 3       | 0       | 0       | 0         |
| hematuresis                 | 3 (10.0%)  | 0              | 3       | 0       | 0       | 0         |
| <b>irAE</b>                 |            |                |         |         |         |           |
| Hypothyroidism              | 7 (23.3%)  | 0              | 5       | 2       | 0       | 0         |
| Hyperthyroidism             | 1 (3.3%)   | 0              | 0       | 1       | 0       | 0         |
| Pneumonia                   | 0          | 0              | 0       | 0       | 0       | 0         |
| Myocardial enzyme increased | 1 (3.3%)   | 0              | 0       | 1       | 0       | 0         |

No patients had any adverse events of Grade 4/5.

Abbreviations: ALT, alanine transaminase; AST, aspartate transaminase; irAE, immune-related adverse event.
